# Supplementary material
Source: PubMed Central journal article supplement (PMC2529128)

## Supplementary Legend

**Figure S1.** TRAIL and ABT-737 induced cleavage of caspases and Bid. A498 renal cancer cells were treated with DMSO, TRAIL, ABT-737 or the combination for 6h (**A**; *left panel*) or 24h (**B**; *right panel*). Western blots were accomplished to measure the level of caspase-8, Bid, caspase-9, caspase-3 and GAPDH. Arrows denote procaspase-8 (p55 and p53), first cleavage fragments (p47 and p43) and the active p18 form of caspase-8; procaspase-9 (p47) and the cleavage products (p37 and p35); procaspase-3 (p32) and the cleavage products (p21, p17); and full length Bid (p22) and the truncated Bid (p15).

**Figure S2.** Apoptosis induced by TRAIL and ABT-737 requires activation of both caspase-8 and caspase-9. (**A**) Bax expression levels in HCT116 and DU145 cell lines demonstrated by western blot analysis. The GAPDH antibody probe serves as a loading control. (**B**) Bax-proficient (Bax<sup>+/+</sup>) and -deficient (Bax<sup>-/-</sup>) HCT116 cells were treated with or without ABT-737 and 50 ng/ml TRAIL for 16 hr. Cell viability (% change from the control) was determined by acid phosphatase assay (Mean $\pm$ SD, n=4). (**C**) Western blots demonstrate the role of caspase cleavage to induction of apoptosis. PV10 cells were pretreated with DMSO, z-LEHD-fmk (20  $\mu$ M; caspase-9 inhibitor), or z-IETD-fmk (20  $\mu$ M; caspase-8 inhibitor) followed by ABT-737, TRAIL or combination therapy for 3 hr. (**D**) PV-10 cells were treated as in Figure S2C for 16 hr with ABT-737, TRAIL, z-LEHD, z-IETD-fmk or the combination and changes in cell viability was assessed by an acid phosphatase assay (Mean $\pm$ SD, n=4).

**Figure S3.** The effect of an inactive ABT-737 enantiomer on cell viability and synergism with TRAIL. PV-10 cells were treated with 10  $\mu$ M inactive enantiomer or ABT-737 with or without TRAIL (100 ng/ml). The acid phosphatase assay was done to assess cell viability and the mean  $\pm$  SD (n=4) is shown.

**Figure S4.** The role of Bak in TRAIL and ABT-737-induced apoptosis. (**A**) Western blot analysis of PV10 cells transfected with either control or Bak siRNA for 48hr. (**B**) PV10 cells transfected with either control or Bak siRNA duplexes were treated with DMSO, 100 ng/ml TRAIL, ABT-737 10  $\mu$ M or the combination for 24 hr. Cell viability was measured by the acid phosphatase assay (Mean  $\pm$  SD, n=4). (**C**) DU145 and HCT116 cell lines were transfected with a Bak expressing cDNA or empty control vector for 48 hr. The overexpression of Bak was examined by western blotting. (**D**) Bak-overexpressing DU145 and HCT116 Bax<sup>-/-</sup> cells were treated with DMSO, 100 ng/ml TRAIL, ABT-737 10  $\mu$ M or the combination for 24 hr. Cell viability was measured by the acid phosphatase assay (Mean  $\pm$  SD, n=4).

**Figure S5.** The synergism of ABT-737 and TRAIL in the induction of apoptosis requires DR5. (**A**) Tumor cell lines were treated with either DMSO (-) or 10  $\mu$ M ABT-737 (+) for 24 hr and western blots carried out to measure DR5 levels. (**B**) PV10 cells were treated with either 10  $\mu$ M ABT-737 or an inactive enantiomer in the presence or absence of z-VAD-fmk (20  $\mu$ M) for 16 hr. Cell extracts were used for western blotting with DR5, DR4 and GAPDH antibodies. (**C**) 786-O cells were transfected with pcDNA3.1 expressing DR5 (0, 0.1, 0.5, 1 or 2  $\mu$ g) for 36 hr and extracts of these cells were subjected to western blotting with antibodies to DR5 and GAPDH. PV10 cells treated with ABT-737 were used as a control. (**D**) 786-O cells expressing DR5 (1  $\mu$ g DNA), which produced a similar level of DR5 expression to that seen in the PV10 cells, were treated with DMSO, TRAIL (100 ng/ml), ABT-737 or the combination for 16hr. Cell viability was assessed by acid phosphatase assay (Mean  $\pm$  SD, n=4).

**Figure S6.** Identification of the region of the DR5 promoter regulated by ABT-737. **(A)** PV10 cells were transfected with the pGVB2-based reporter plasmids (4 µg DNA) containing various lengths of 5'- human DR5 promoter gene. Cells were treated with DMSO or ABT-737 for 24 hr. Luciferase activity was measured as described in Methods and the activity was normalized to *Renilla*-luc as described (Mean +/- SD, n=3). **(B)** PV10 cells were co-transfected with siRNA duplexes targeting CHOP and PGVB2-DR5-luc and then treated with DMSO, ABT-737 or tunicamycin (1 µM). Luciferase activity was measured as described in Methods and the activity was normalized to *Renilla*-luc as described (Mean +/-SD, n=3).

Figure S1

**A**

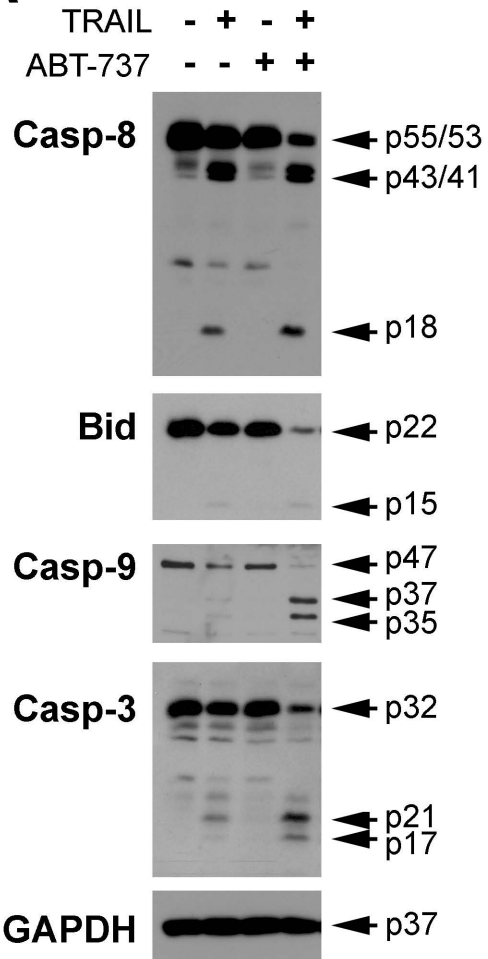

**B**

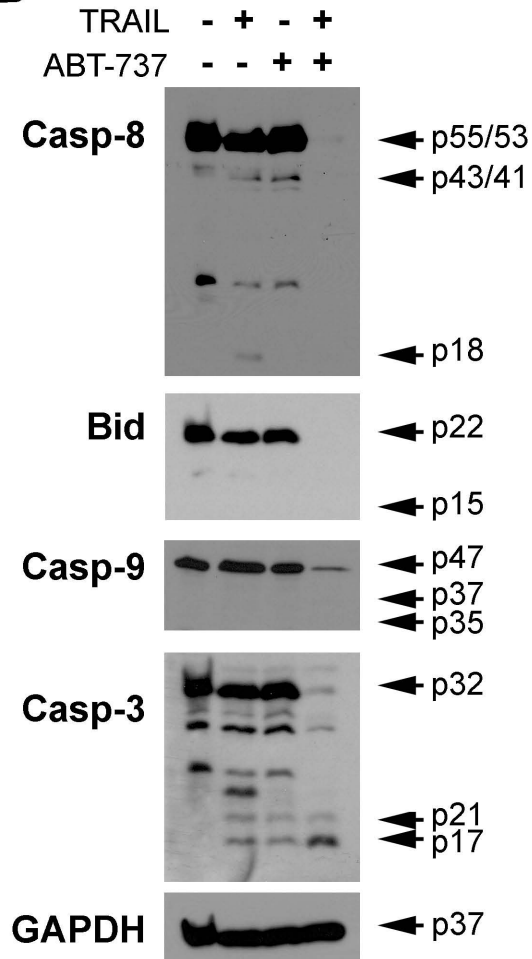

Figure S2

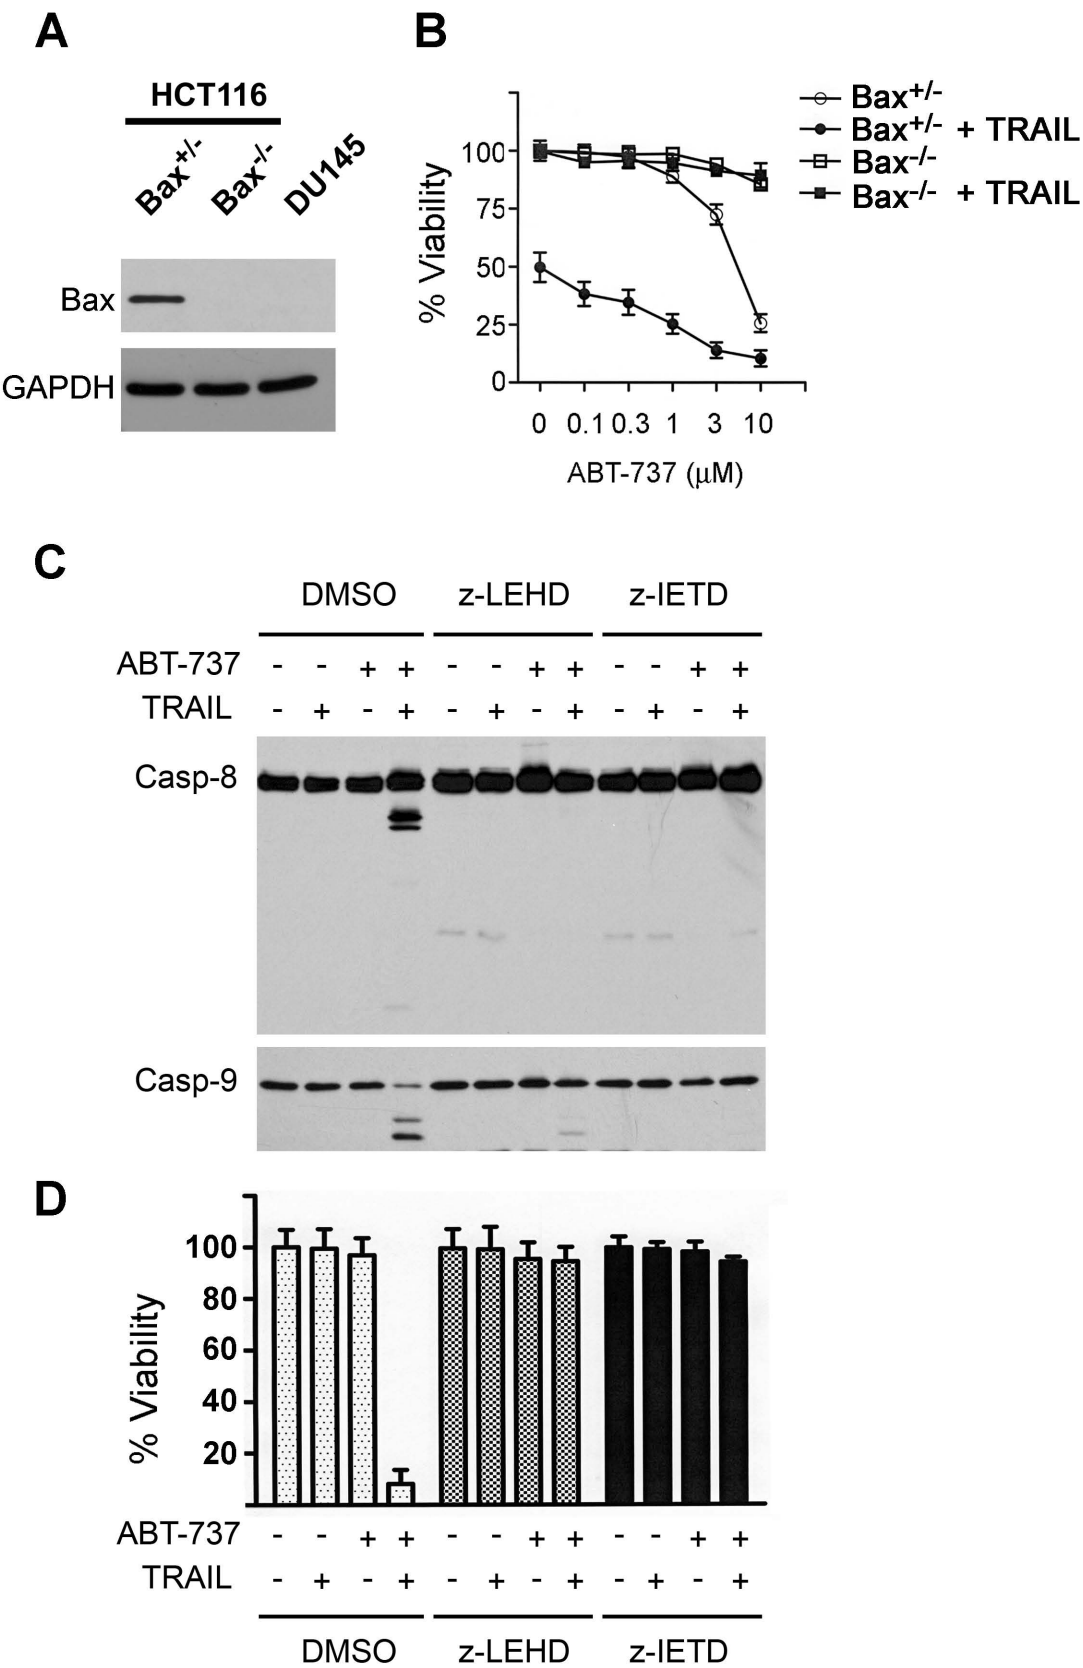

Figure S3

A

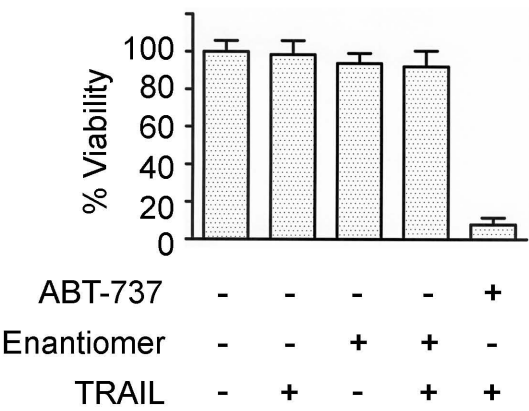

Figure S4

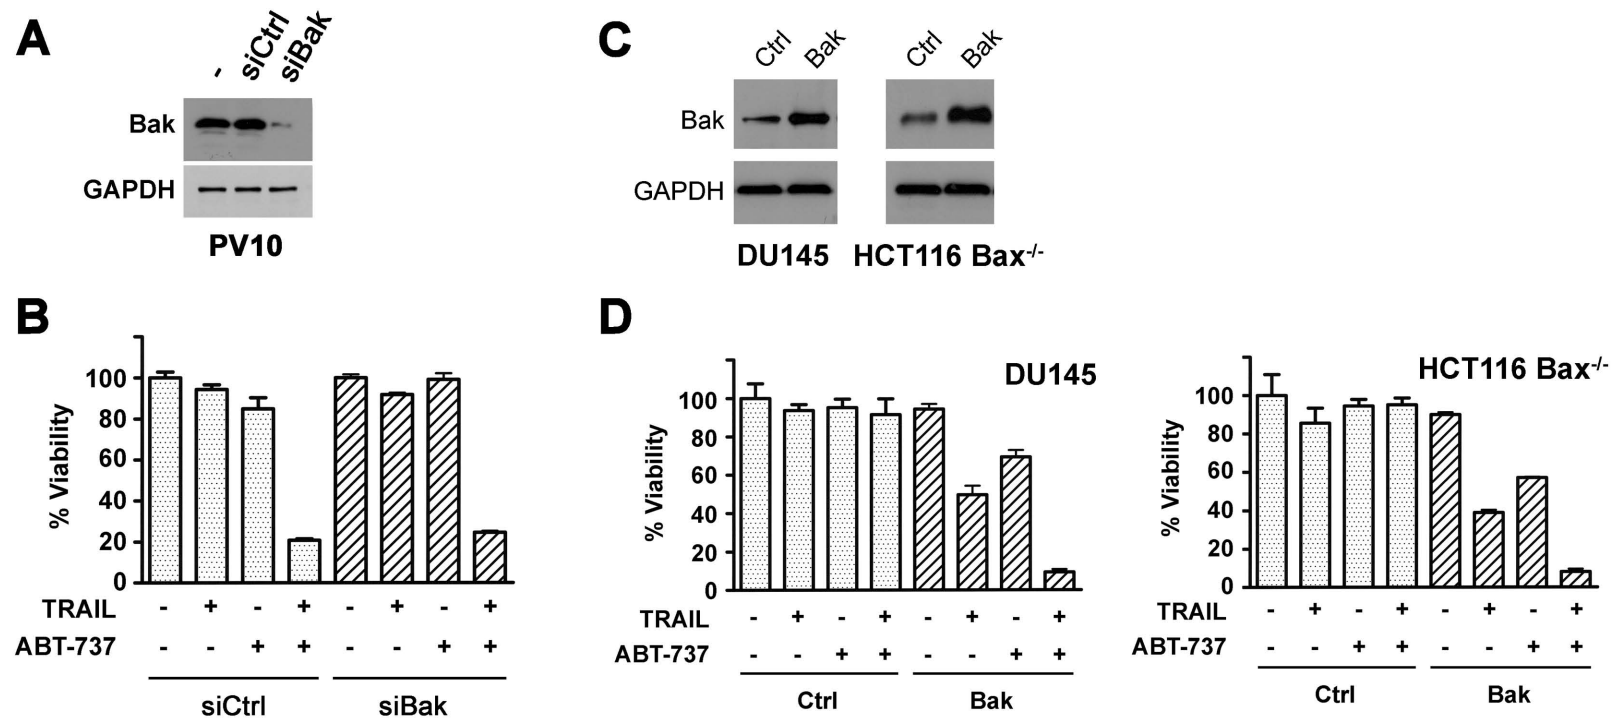

Figure S5

**A**

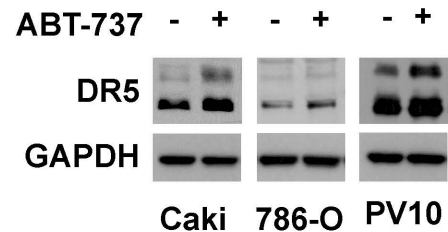

**B**

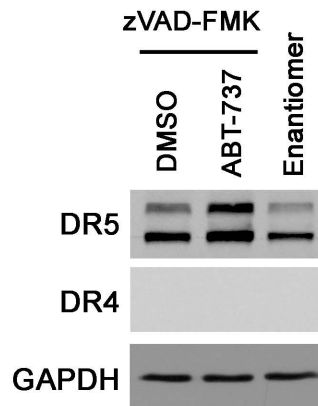

**C**

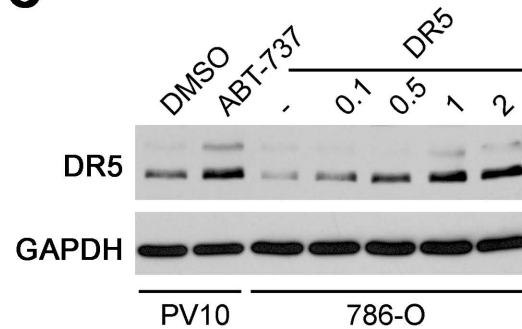

**D**

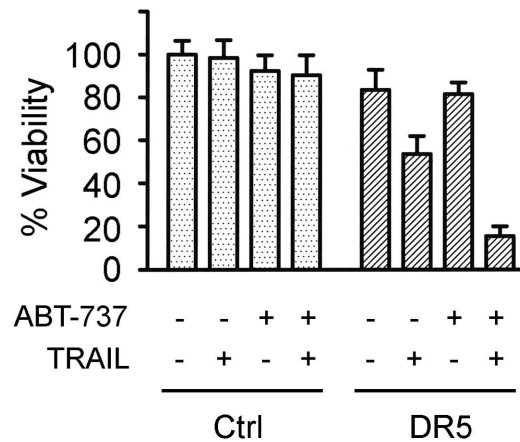

Figure S6

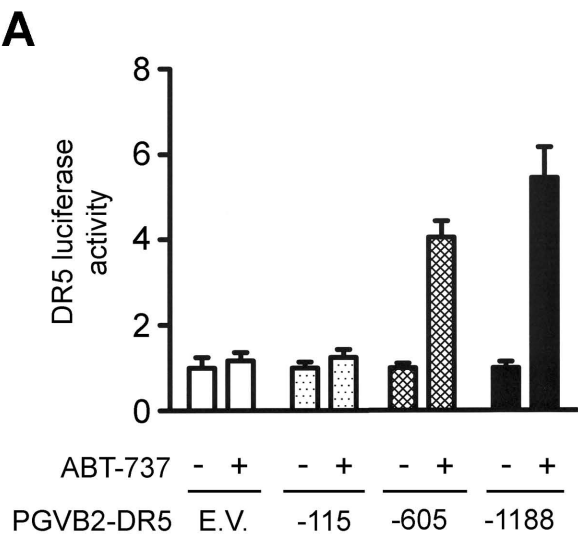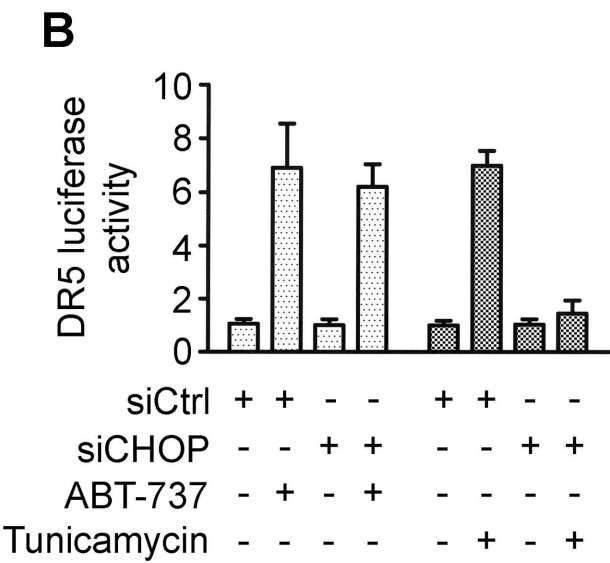

Supplement: M802511200_1.pdf [file M802511200_1.pdf]
